# Supplementary material for: Facile Synthesis of Rambutan‐Like ZnO Hierarchical Hollow Microspheres with Highly Photocatalytic Activity
Source: Hindawi journal article supplement (doi:10.1155/2015/242798), 2015-01-01
Supplement: f1 [file 242798.f1.doc]

**Supporting Information**

# Facile synthesis of rambutan-like ZnO hierarchical hollow microspheres with highly photocatalytic activity

Ke-Jian Ju,a Ming Zhang,b Qian-Li Zhang,a* Jie Wei,a Ai-Jun Wang b c*

*a School of Chemistry and Biological Engineering, Suzhou University of Science and Technology, Suzhou, 215009, China*

b School of Chemistry and Chemical Engineering, Henan Normal University, Xinxiang, 453007, China

*c College of Geography and Environmental Science, Zhejiang Normal University, Jinhua 321004, China*

**Corresponding author:* [*zqlmhb@163.com (Q.L*](mailto:zqlmhb@163.com (Q.L)*. Zhang),* [*ajwang@zjnu.cn (A.J.Wang)*](mailto:ajwang@zjnu.cn (A.J.Wang))*.*

**Fig. S1.** SEM image of commercial ZnO sample.


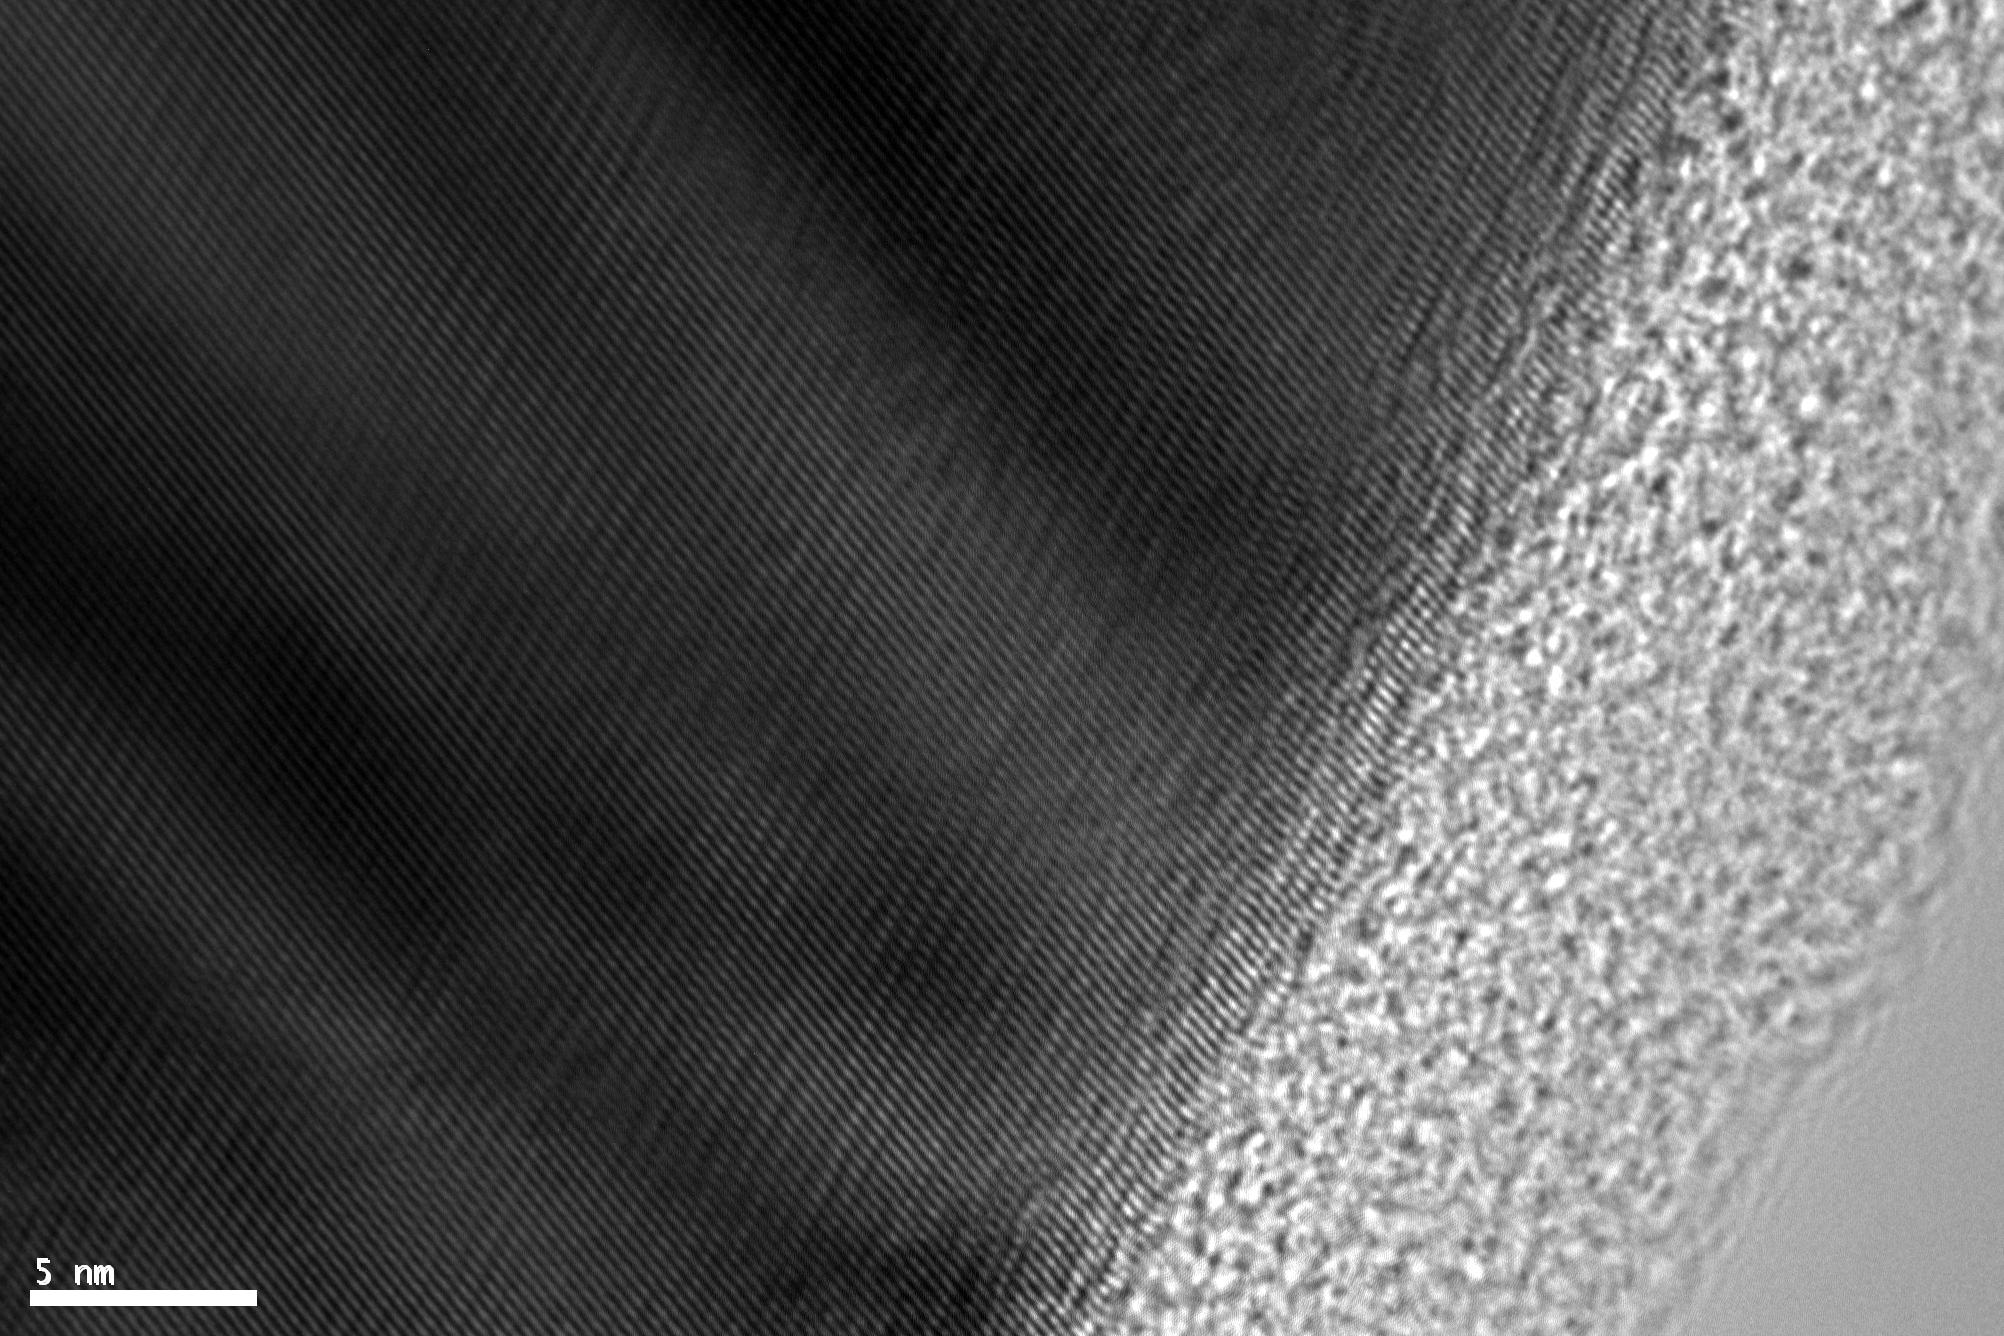


**B**

**0.26 nm**

**2 nm**


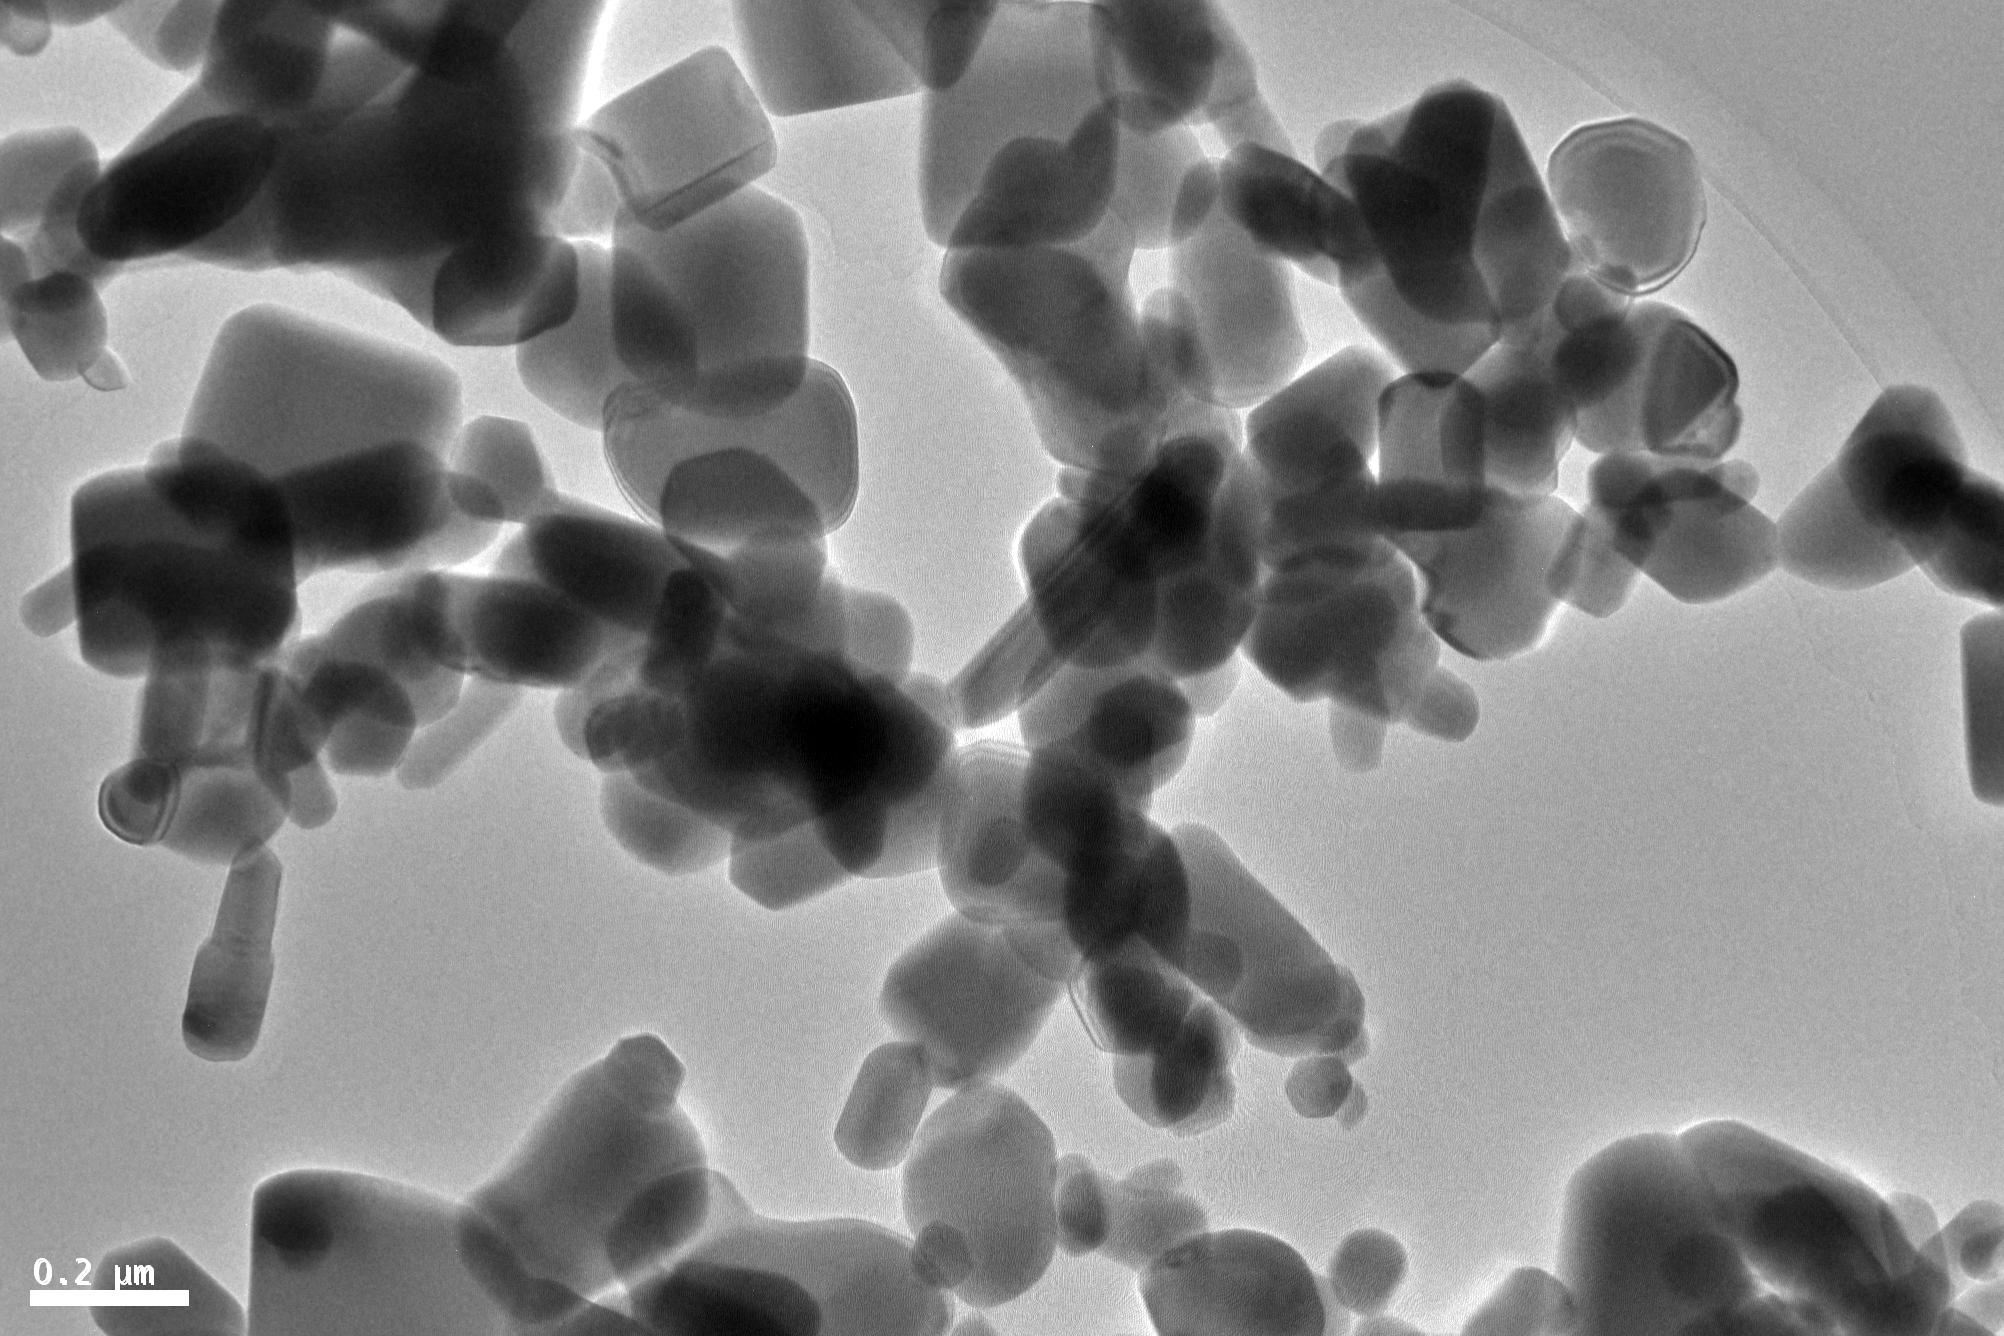


**200 nm**

**A**

**Fig. S2.** (A) TEM image of the commercial ZnO. (B) HRTEM imagesof the commercial ZnO.

**Fig. S3.** Typical FTIR spectrum of the rambutan-like ZnO hierarchical hollow microspheres.

**Fig. S4.** XRD patterns of the ZnO products after 2 h of reaction.

**Fig. S5.** RhB degradation curves of the C/C0 *vs*. time for the first cycle and the fifth cycle of rambutan-like ZnO HHMs.

**Fig. S6.** RhB degradation curves of the C/C0 *vs*. time for photodegradation of ZnO samples obtained from different reaction time.
